# Supplementary material
Source: PubMed Central journal article supplement (PMC4456685)
Supplement: NIHMS670640-supplement-Supplemental_Information.pdf [file NIHMS670640-supplement-Supplemental_Information.pdf]

## SUPPLEMENTAL INFORMATION

### Supplemental Data:

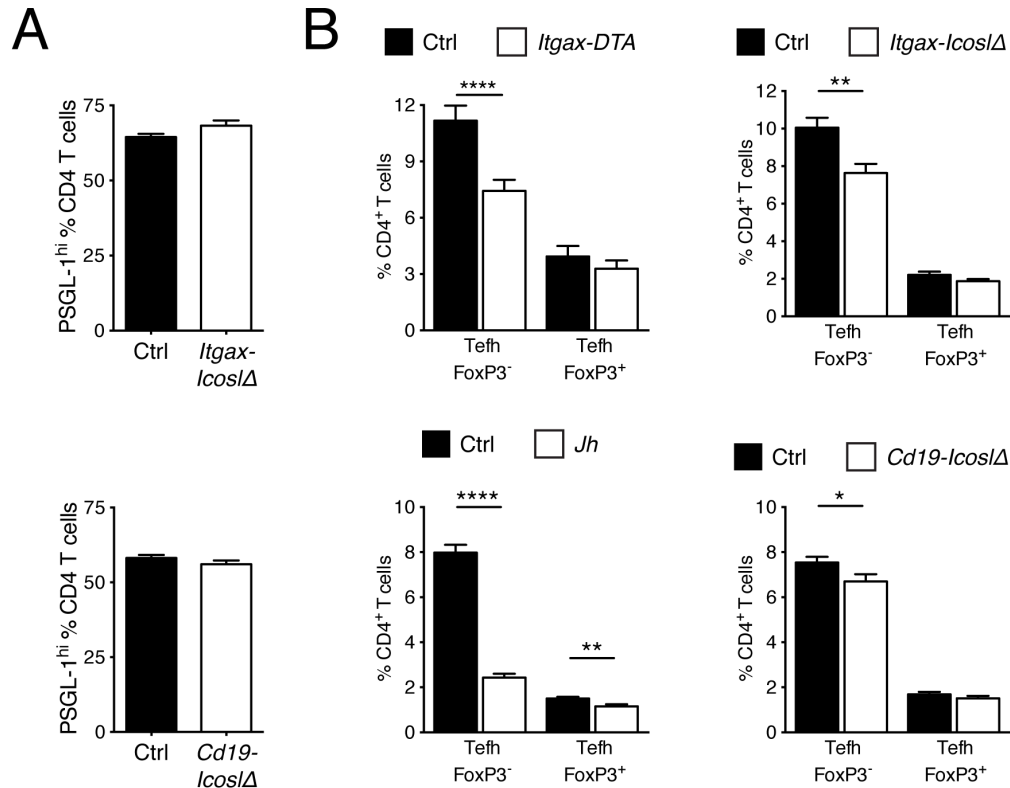

**Figure S1, related to Figure 2. FoxP3<sup>+</sup> Tefh cells are not reduced in lupus-prone mice deficient for *Icosl* in CD11c<sup>+</sup> or B cells.**

(A) Percentage of PSGL-1<sup>hi</sup> cells among CD4<sup>+</sup> T cells in spleens from *Itgax-Icosl*<sup>Δ</sup> and *Cd19-Icosl*<sup>Δ</sup> mice with their respective controls. n = 13 for *Itgax-Icosl*<sup>Δ</sup> mice and n = 25 for controls; n = 20 for *Cd19-Icosl*<sup>Δ</sup> mice and n = 29 for controls.

(B) Percentage of FoxP3<sup>-</sup> and FoxP3<sup>+</sup> Tefh cells among CD4<sup>+</sup> T cells in spleens from *Itgax-Icosl*<sup>Δ</sup>, *Cd19-Icosl*<sup>Δ</sup>, *Itgax-DTA* and *Jh* MRL.*Fas*<sup>lpr</sup> mice with their respective controls. n = 22 for *Itgax-Icosl*<sup>Δ</sup> mice and n = 24 for controls; n = 21 for *Cd19-Icosl*<sup>Δ</sup> mice and n = 23 for controls; n = 15 *Itgax-DTA* and n = 16 for controls; n = 19 for *Jh* MRL.-*Fas*<sup>lpr</sup> mice and n = 21 for controls.

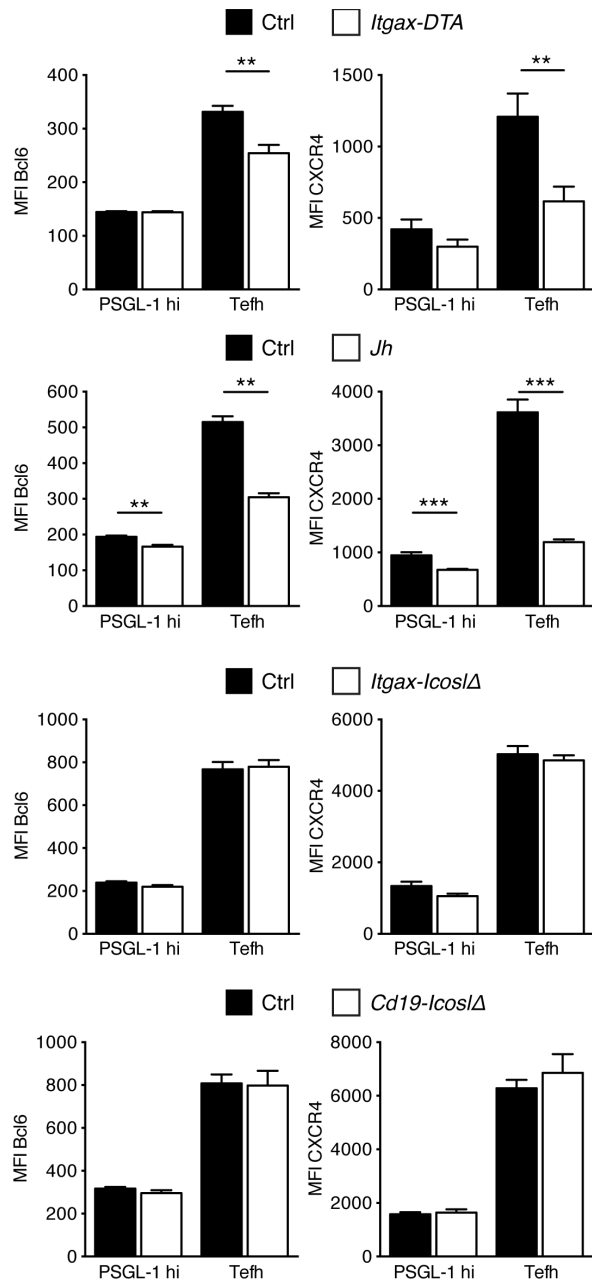

**Figure S2, related to Figure 3. Bcl6 and CXCR4 expression by Tefh cells is unimpaired in MRL.*Fas*<sup>lpr</sup> mice lacking ICOSL on CD11c<sup>+</sup> or B cells.**

Mean fluorescence intensity (MFI) for Bcl6 (left column) and CXCR4 (right column) of Tefh cells in spleens from *Itgax-DTA*, *Jh* MRL.*Fas*<sup>lpr</sup>, *Itgax-Icosl*<sup>Δ</sup> and *Cd19-Icosl*<sup>Δ</sup> mice with their respective controls. n = 6 for *Itgax-Icosl*<sup>Δ</sup> mice and n = 6 for controls; n = 10 for *Cd19-Icosl*<sup>Δ</sup> mice and n = 23 for controls; n = 7 *Itgax-DTA* and n = 6 for controls; n = 4-6 for *Jh* MRL.*Fas*<sup>lpr</sup> mice and n = 8 for controls. Data are represented as mean ± SEM.

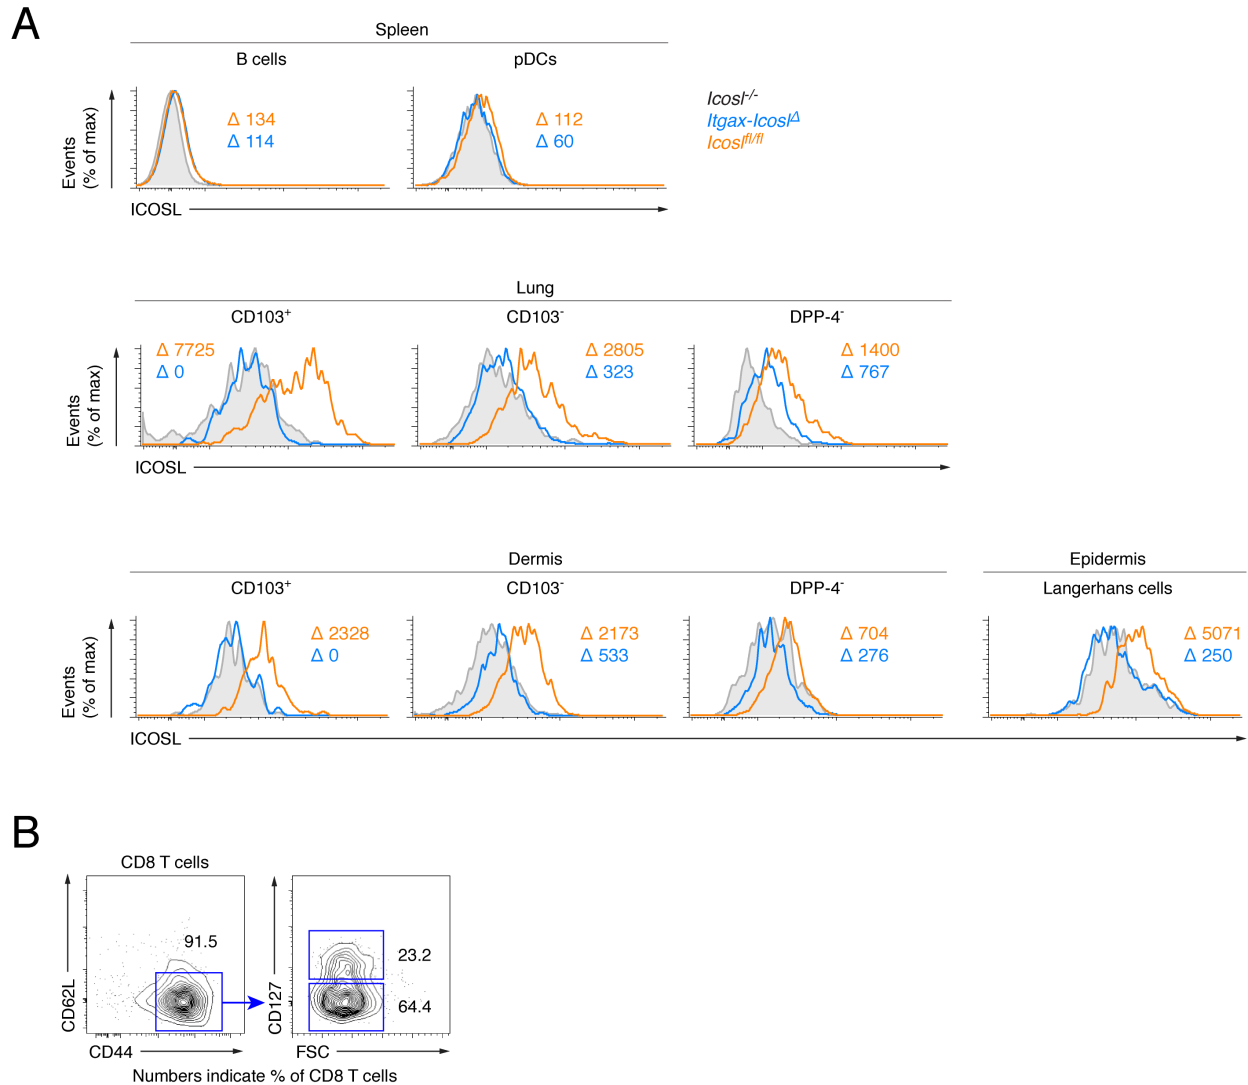

**Figure S3, related to Figure 5. CD11c<sup>+</sup> cells in inflamed peripheral organs express high levels of ICOSL.**

(A) Histograms for ICOSL expression of B cells and pDCs in spleens, several CD11c<sup>+</sup> MHCII<sup>+</sup> subsets (CD103<sup>+</sup>DPP-4<sup>+</sup>, CD103<sup>-</sup>DPP-4<sup>+</sup> and DPP-4<sup>-</sup>) in lungs and dermis, and Langerhans cells in epidermis from control MRL.Fas<sup>pr</sup> (*Icosl<sup>fl/fl</sup>*, n = 4), *Itgax-Icosl $\Delta$*  (n = 4) and *Icost<sup>-/-</sup>* (n = 2) mice. Values indicate MFI minus background staining (MFI of *Icost<sup>-/-</sup>*).

(B) Flow cytometry plots showing CD44, CD62L and CD127 staining characteristics of gated CD8<sup>+</sup> T cells in kidney cell suspensions of wild type MRL.Fas<sup>pr</sup> mice (n = 5). Values indicate percentage of CD8<sup>+</sup> T cells (mean).

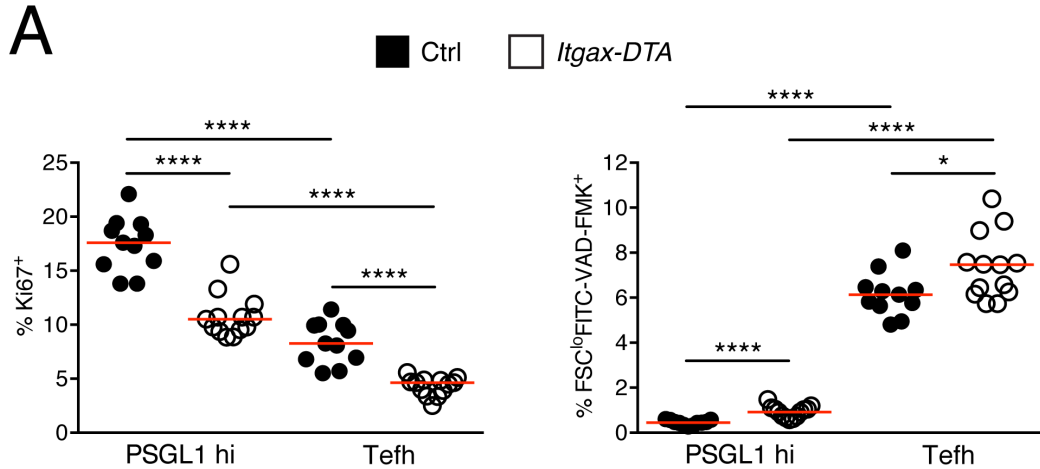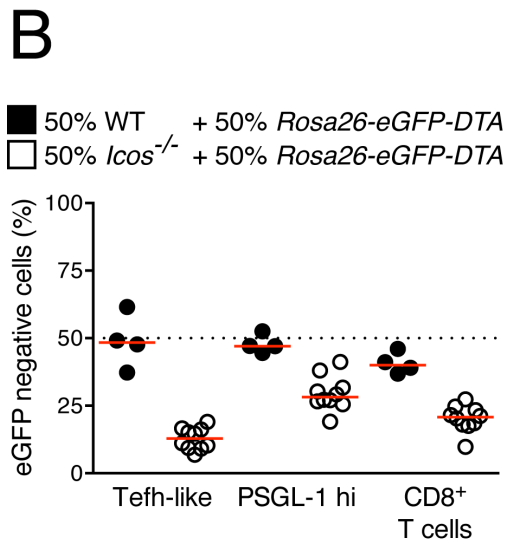

**Figure S4, related to Figure 6. ICOS-deficiency impairs T cell accrual in kidneys in a cell-intrinsic manner.**

(A) Percentage of cycling (Ki67<sup>+</sup>, left) and apoptotic (FSC<sup>lo</sup>FITC-VAD-FMK<sup>+</sup>, right) PSGL1<sup>hi</sup> CD4<sup>+</sup> T cells and Tefh cells in spleens from control (black) and *Itgax*-DTA (white) mice.

(B) *Rosa-eGFP-DTA* MRL.*Fas*<sup>lpr</sup> mice were lethally irradiated and reconstituted with a mixture of 50% wild type MRL.*Fas*<sup>lpr</sup> and 50% *Rosa26-eGFP-DTA* MRL.*Fas*<sup>lpr</sup> (black), or 50% *Icos*<sup>-/-</sup> MRL.*Fas*<sup>lpr</sup> and 50% *Rosa26-eGFP-DTA* MRL.*Fas*<sup>lpr</sup> (white) bone marrow cells. The scatter plot shows the percentage of eGFP negative cells among renal Tefh-like, PSGL-1<sup>hi</sup> CD4<sup>+</sup>, and CD8<sup>+</sup> T cells. Note that *Rosa26-eGFP-DTA* MRL.*Fas*<sup>lpr</sup> mice display generalized expression of eGFP (DTA transcription is prevented by a transcriptional stop sequence).

Each dot represents an individual mouse and horizontal lines represent the median.

**Table S1, related to Figure 1. Deletion efficacy of *Icosl***

| Mice                           | Cell Population      | Tissue | n | Deletion efficacy (%) |
|--------------------------------|----------------------|--------|---|-----------------------|
| <i>Itgax-Icosl<sup>Δ</sup></i> | cDCs                 | Spleen | 2 | 95.2                  |
|                                | pDCs                 | Spleen | 2 | 61.8                  |
|                                | Red pulp macrophages | Spleen | 2 | 5.9                   |
|                                | Neutrophils          | Spleen | 2 | 0                     |
|                                | B cells              | Spleen | 2 | 23.1                  |
|                                | CD11c+MHCII+         | Kidney | 2 | 91.2                  |
| <i>Cd19-Icosl<sup>Δ</sup></i>  | B cells              | Spleen | 3 | 95.8                  |
|                                | Ab-forming cells     | Spleen | 3 | 90.3                  |
|                                | cDCs                 | Spleen | 3 | 0                     |
|                                | pDCs                 | Spleen | 3 | 2.2                   |
|                                | Red pulp macrophages | Spleen | 3 | 0                     |
|                                | Neutrophils          | Spleen | 3 | 0                     |
|                                | B cells              | Kidney | 3 | 89.9                  |

Deletion efficacy of *Icosl* in various cell types isolated from spleens and kidneys was determined by measuring the amount of residual *Icosl<sup>fl</sup>* by qRT-PCR. Cell populations were purified by FACS. Spleen: cDCs (CD11c<sup>hi</sup>MHCII<sup>+</sup>CD19<sup>-</sup>), pDCs (Siglec-H<sup>+</sup>BST2<sup>+</sup>CD11c<sup>int-hi</sup>), red pulp macrophages (F4/80<sup>+</sup>CD11b<sup>+</sup>), neutrophils (GR-1<sup>hi</sup>CD11b<sup>+</sup>), B cells (CD19<sup>+</sup>CD22<sup>+</sup>), Ab-forming cells (intracellular- $\kappa$ <sup>hi</sup>CD138<sup>hi</sup>CD19<sup>int</sup>CD44<sup>+</sup>TCR $\beta$ <sup>-</sup>). Kidney: CD11c+MHCII+ (CD11c+MHCII+CD45+CD19-TCR $\beta$ -), B cells (CD19+MHCII+ CD45+). To calculate deletion efficacy values for qRT-PCR the equation  $(1 - \text{residual } Icosl) \times 100$  was used. Residual *Icosl* values were calculated as  $2^{-\Delta\Delta C_t}$ . Negative deletion efficacy values were set to 0.

## Supplemental Experimental Procedures:

### Ab clones used for FACS

Anti-Bcl6 (K112-91), anti-BST2 (927), anti-CD4 (GK1.5), anti-CD8 (TIB 105), anti-CD11b (M1/70), anti-CD11c (N418), anti-CD19 (1D3), anti-CD22 (Cy34.1), anti-CD25 (PC61), anti-CD44 (1M7), anti-CD45 (30-F11), anti-CD45R (RA3-6B2), anti-CD62L (Mel-14), anti-CD103 (2E7), anti-CD127 (A7R34), anti-CXCR4 (2B11), anti-DPP-4 (H194-112), anti-F4/80 (BM8), anti-FoxP3 (FJK-16s), anti-I-A/I-E (M5/114), anti-IFN- $\gamma$  (XMG1.2), anti-PSGL1 (2PH1), anti-Siglec-H (eBio440c), and anti-TCR $\beta$  (H57-597).

### qRT-PCR

To quantify deletion efficacy of *Icosl*, genomic DNA was extracted from FACS purified cells and used as template for qRT-PCR. The amount of *Icosl* in each sample was normalized to the unaffected gene *I10*. Primer sequences (5'—3') for *Icosl* were forward ACCTACACCTGCATGTCCAA and reverse TCTCTACGCAGCACAGAACA, and for *I10* forward GCTCTTACTGACTGGCATGAG and reverse CGCAGCTCTAGGAGCATGTG. qRT-PCR was performed with the Agilent Brilliant II SYBR Green QPCR kit on a Stratagene Mx3000P instrument.

### Mixed bone marrow chimeras

For mixed bone marrow chimeras 6-7 wk old *Rosa26-eGFP-DTA* MRL.*Fas<sup>lpr</sup>* mice (Teichmann et al., 2010) were irradiated with 800 cGy and injected intravenously with  $5 \times 10^6$  *Icosl*<sup>-/-</sup> MRL.*Fas<sup>lpr</sup>* (Odegard et al., 2008) together with  $5 \times 10^6$  *Rosa26-eGFP-DTA* MRL.*Fas<sup>lpr</sup>* mice bone marrow cells. Controls were generated in the same experiments using  $5 \times 10^6$  wild type MRL.*Fas<sup>lpr</sup>* instead of *Icosl*<sup>-/-</sup> MRL.*Fas<sup>lpr</sup>* bone marrow cells. Chimeras were analyzed 21 wks after transplantation.
